# JOURNAL OF POLITENESS RESEARCH

Language, Behaviour, Culture

MOUTON DE GRUYTER a division of Walter de Gruyter GmbH. & Co. KG

## Rate card No. 2 /2009

**Size:** 225 mm x 148 mm

**Full page:** 176 mm x 109 mm 600 Euro

**Half page:** 85 mm x 109 mm 350 Euro

**Price:** on request  
Publisher`s discount 10%  
Agency commission 15%

**Inserts:** quotations on request

**Printing:** offset (no colour printing)

### Reproduction requirements:

PDF-Files directly:

**AZ Druck und Datentechnik GmbH**

ISDN: + 49 (831) 206-473 Leonardo

e-mail: [degruyter@az-druck.de](mailto:degruyter@az-druck.de)

disk/CD-ROM AZ Druck und Datentechnik GmbH  
Heisinger Straße 16, D-87437 Kempten (Allgäu)  
Tel.: 0831 / 206 - 185  
Fax.: 0831 / 206 - 369

**Frequency:** 2 issues per year

**Deadline:** two months prior to the month of publication

### Method of Payment:

Net payment should be made within 30 days from date of invoice.

Prices are given in Euro (€); other currencies will be accepted subject to current exchange rates.

Bankers: Postbank Berlin, Acct. no. 103 07-108, Bank code 100 100 10

Berliner Bank AG, Berlin, Acct. no. 32 07523 500, Bank Code 100 200 00

Payment may also be made by cheque or the following credit cards:

American Express\*, MasterCard (Acces), Visa, Eurocard (\*not applicable for North America)

If paying by cheque please add €5,- to cover bank charges.

### Conditions:

1. The publisher reserves the right to refuse or cancel any advertisement at any time.
2. The publisher will not be liable for loss or damage occasioned by failure of an advertisement to appear or by incorrect appearance.
3. All costs incurred in sending copy for publication and for typesetting or alterations arising from failure to comply with technical requirements will be charged to the advertiser.

**JOURNAL OF POLITENESS RESEARCH**  
Language, Behaviour, Culture

**Editor-in-Chief:** CHRIS CHRISTIE

The JOURNAL OF POLITENESS RESEARCH responds to the urgent need to provide an international forum for the discussion of all aspects of politeness as a complex linguistic and non-linguistic phenomenon. Politeness has interested researchers in fields of academic activity as diverse as business studies, foreign language teaching, developmental psychology, social psychology, sociolinguistics, linguistic pragmatics, social anthropology, cultural studies, sociology, communication studies, and gender studies. The journal provides an outlet through which researchers on politeness phenomena from these diverse fields of interest may publish their findings and where it will be possible to keep up to date with the wide range of research published in this expanding field. The wealth of published material on the subject of polite language usage should not blind us to the need to extend the study of politeness beyond its linguistic aspects. Hence the multidisciplinary scope of this new journal, which aims to attract original contributions from researchers in a wide range of academic and professional fields. This ambitious and exciting new venture is also a long-awaited opportunity to create synergies between researchers from different disciplines and to encourage dissemination of findings from lesser studied languages and cultures in an effort to deepen our understanding of the nature of politeness within and beyond Western geographical and ideological boundaries.

**Distribution:** worldwide

**Of Interest to:** Researchers and Libraries focusing on Applied Linguistics, Sociolinguistics and Politeness Research

**Main office**

Walter de Gruyter GmbH & Co. KG.  
Attn. Ms. Dietlind Makswitat  
P.O. Box 30 24 21  
10728 Berlin Federal Republic of Germany  
Phone: 49 (030) 260 05-131  
Fax: 49 (030) 260 05-322  
e-mail: <mailto:anzeigen@degruyter.com>
